# Supplementary material for: Comparative effectiveness of six Chinese herb formulas for acute exacerbation of chronic obstructive pulmonary disease: protocol for systematic review and network meta-analysis
Source: PubMed Central journal article supplement — BMJ Open. 2017 Aug 11;7(8):e017099. doi: 10.1136/bmjopen-2017-017099 (PMC5724218; doi:10.1136/bmjopen-2017-017099), 2017-08-11
Supplement: bmjopen-2017-017099.draft_revisions.pdf [file bmjopen-2017-017099.draft_revisions.pdf]

# BMJ Open

BMJ Open is committed to open peer review. As part of this commitment we make the peer review history of every article we publish publicly available.

When an article is published we post the peer reviewers' comments and the authors' responses online. We also post the versions of the paper that were used during peer review. These are the versions that the peer review comments apply to.

The versions of the paper that follow are the versions that were submitted during the peer review process. They are not the versions of record or the final published versions. They should not be cited or distributed as the published version of this manuscript.

BMJ Open is an open access journal and the full, final, typeset and author-corrected version of record of the manuscript is available on our site with no access controls, subscription charges or pay-per-view fees (<http://bmjopen.bmj.com>).

If you have any questions on BMJ Open's open peer review process please email [editorial.bmjopen@bmj.com](mailto:editorial.bmjopen@bmj.com)

# BMJ Open

## Comparative Effectiveness of Six Chinese Herb Formulas for Acute Exacerbation of Chronic Obstructive Pulmonary Disease: Protocol for Systematic Review and Network Meta-analysis

|                                 |                                                                                                                                                                                                                                                                                                                                                                                                                                                                                                                                                                                                                                                                                                                                                                                                                                                                                                                                                                                                                                                                                                                                                                                                                                                                                                                                                                                                                                                                           |
|---------------------------------|---------------------------------------------------------------------------------------------------------------------------------------------------------------------------------------------------------------------------------------------------------------------------------------------------------------------------------------------------------------------------------------------------------------------------------------------------------------------------------------------------------------------------------------------------------------------------------------------------------------------------------------------------------------------------------------------------------------------------------------------------------------------------------------------------------------------------------------------------------------------------------------------------------------------------------------------------------------------------------------------------------------------------------------------------------------------------------------------------------------------------------------------------------------------------------------------------------------------------------------------------------------------------------------------------------------------------------------------------------------------------------------------------------------------------------------------------------------------------|
| Journal:                        | <i>BMJ Open</i>                                                                                                                                                                                                                                                                                                                                                                                                                                                                                                                                                                                                                                                                                                                                                                                                                                                                                                                                                                                                                                                                                                                                                                                                                                                                                                                                                                                                                                                           |
| Manuscript ID                   | bmjopen-2017-017099                                                                                                                                                                                                                                                                                                                                                                                                                                                                                                                                                                                                                                                                                                                                                                                                                                                                                                                                                                                                                                                                                                                                                                                                                                                                                                                                                                                                                                                       |
| Article Type:                   | Protocol                                                                                                                                                                                                                                                                                                                                                                                                                                                                                                                                                                                                                                                                                                                                                                                                                                                                                                                                                                                                                                                                                                                                                                                                                                                                                                                                                                                                                                                                  |
| Date Submitted by the Author:   | 01-Apr-2017                                                                                                                                                                                                                                                                                                                                                                                                                                                                                                                                                                                                                                                                                                                                                                                                                                                                                                                                                                                                                                                                                                                                                                                                                                                                                                                                                                                                                                                               |
| Complete List of Authors:       | Liu, Shaonan; Guangdong Provincial Hospital of Chinese Medicine, Evidence-based Medicine and Clinical research Serve Group; The Second Clinical College of Guangzhou University of Chinese Medicine, Chen, Jing; Guangdong Provincial Hospital of Chinese Medicine, Evidence-based Medicine and Clinical research Serve Group; The Second Clinical College of Guangzhou University of Chinese Medicine, He, Yihan; Guangdong Provincial Hospital of Chinese Medicine, Evidence-based Medicine & Clinical Research Service Group; The Second Clinical College of Guangzhou University of Chinese Medicine Wu, Lei; Guangdong Provincial Hospital of Chinese Medicine, Respiratory department; The Second Clinical College of Guangzhou University of Chinese Medicine, Lai, Jiaqi; Guangdong Provincial Hospital of Chinese Medicine, Evidence-based Medicine and Clinical research Serve Group; The Second Clinical College of Guangzhou University of Chinese Medicine, Zuo, Jinhong; The Second Clinical College of Guangzhou University of Chinese Medicine, Yang, Lihong; Guangdong Provincial Hospital of Chinese Medicine, Evidence-based Medicine and Clinical research Service Group; The Second Clinical College of Guangzhou University of Chinese Medicine Guo, Xinfeng; Guangdong Provincial Hospital of Chinese Medicine, Evidence-based Medicine and Clinical research Serve Group; The Second Clinical College of Guangzhou University of Chinese Medicine |
| <b>Primary Subject Heading</b>: | Complementary medicine                                                                                                                                                                                                                                                                                                                                                                                                                                                                                                                                                                                                                                                                                                                                                                                                                                                                                                                                                                                                                                                                                                                                                                                                                                                                                                                                                                                                                                                    |
| Secondary Subject Heading:      | Respiratory medicine                                                                                                                                                                                                                                                                                                                                                                                                                                                                                                                                                                                                                                                                                                                                                                                                                                                                                                                                                                                                                                                                                                                                                                                                                                                                                                                                                                                                                                                      |
| Keywords:                       | Chronic airways disease < THORACIC MEDICINE, STATISTICS & RESEARCH METHODS, COMPLEMENTARY MEDICINE                                                                                                                                                                                                                                                                                                                                                                                                                                                                                                                                                                                                                                                                                                                                                                                                                                                                                                                                                                                                                                                                                                                                                                                                                                                                                                                                                                        |
|                                 |                                                                                                                                                                                                                                                                                                                                                                                                                                                                                                                                                                                                                                                                                                                                                                                                                                                                                                                                                                                                                                                                                                                                                                                                                                                                                                                                                                                                                                                                           |

1  
2  
3  
4  
5  
6  
7  
8  
9  
10  
11  
12  
13  
14  
15  
16  
17  
18  
19  
20  
21  
22  
23  
24  
25  
26  
27  
28  
29  
30  
31  
32  
33  
34  
35  
36  
37  
38  
39  
40  
41  
42  
43  
44  
45  
46  
47  
48  
49  
50  
51  
52  
53  
54  
55  
56  
57  
58  
59  
60

SCHOLARONE™  
Manuscripts

For peer review only

1  
2  
3  
4  
5  
6  
7  
8  
9  
10  
11  
12  
13  
14  
15  
16  
17  
18  
19  
20  
21  
22  
23  
24  
25  
26  
27  
28  
29  
30  
31  
32  
33  
34  
35  
36  
37  
38  
39  
40  
41  
42  
43  
44  
45  
46  
47  
48  
49  
50  
51  
52  
53  
54  
55  
56  
57  
58  
59  
60

## Comparative Effectiveness of Six Chinese Herb Formulas for Acute Exacerbation of Chronic Obstructive Pulmonary Disease: Protocol for Systematic Review and Network Meta-analysis

Shaonan Liu<sup>1,2,3,4</sup>, Jing Chen<sup>1,2,3,4</sup>, Yihan He<sup>1,2,3,4</sup>, Lei Wu<sup>1,2,3,4</sup>, Jiaqi Lai<sup>1,2,3,4</sup>, Jinhong Zuo<sup>2</sup>, Lihong Yang<sup>1,2,3,4</sup>, Xinfeng Guo<sup>1,2,3,4\*</sup>

1. Guangdong Provincial Hospital of Chinese Medicine, Guangzhou, China.
2. The Second Clinical College of Guangzhou University of Chinese Medicine, Guangzhou, China.
3. The Second Affiliated Hospital of Guangzhou University of Chinese Medicine, Guangzhou, China.
4. Guangdong Provincial Academy of Chinese Medical Sciences, Guangzhou, China.

Email:

Shaonan Liu: [shaonan819@sina.com](mailto:shaonan819@sina.com)

Jing Chen: [576215023@qq.com](mailto:576215023@qq.com)

Yihan He: [yihanhe@126.com](mailto:yihanhe@126.com)

Lei Wu: [drleiwu@163.com](mailto:drleiwu@163.com)

Jiaqi Lai: [2287028962@qq.com](mailto:2287028962@qq.com)

Jinhong Zuo: [15297775314@163.com](mailto:15297775314@163.com)

Lihong Yang: [lihongyanggd@yeah.net](mailto:lihongyanggd@yeah.net)

Xinfeng Guo: [guoxinfeng@139.com](mailto:guoxinfeng@139.com)

Corresponding author: Xinfeng Guo

Address: No. 111, Dade Road, Guangzhou, China, postbox 510120

Tel: +8613678906862

Fax number: 00862081887233\*35842

Keywords: Chinese herb formula, Acute Exacerbation Chronic Obstructive Pulmonary Disease (AECOPD), systematic review, network meta-analysis

Word count: 1874

## Abstract

### Introduction

Chinese medicine is commonly used to combine with pharmacotherapy for the treatment of acute exacerbation of chronic obstructive pulmonary disease (AECOPD). Six Chinese herb formulas involving *Weijing* decoction, *Maxingshigan* decoction, *Yuebijiabanxia* decoction, *Qingqihuatan* decoction, *Dingchuan* decoction and *Sangbaipi* decoction are recommended in Chinese medicine clinical guideline or text book, to relieve patients with phlegm-heat according to Chinese syndrome differentiation. However, the comparative effectiveness among these six formulas has not been investigated in published randomized controlled trials. We plan to summarize the direct and indirect evidence for these six formulas combined with pharmacotherapy to determine the relative merits options for the management of AECOPD.

### Methods and analysis

We will perform the comprehensive search for the randomized controlled trials to evaluate the effectiveness of six Chinese herbal formulas recommended in Chinese medicine clinical guideline or text book. The combination of pharmacotherapy includes bronchodilators, antibiotics and corticosteroids that are routinely prescribed for AECOPD. The primary outcome will be lung function, arterial blood gases and length of hospital stay. The data screening and extraction will be conducted by two different reviewers. The quality of RCT will be assessed according to the Cochrane handbook risk of bias tool. The Bayes of network meta-analysis will be conducted with winBUGS to compare the effectiveness of six formulas. We will also use the Surface Under the Cumulative Ranking Curve (SUCRA) to obtain the comprehensive rank for these treatments.

### Ethics and dissemination

This review does not require ethics approval and the results of network meta-analysis will be submitted to a peer-review journal.

**Protocol registration number:** PROSPERO CRD42016052699

### The strength and limitations of the study

This study will be the first meta-analysis to compare the Chinese herb formula combined with pharmacotherapy for AECOPD.

The results of this study will provide the additional evidence for the clinical guideline and help the clinical practitioners to make decision for the treatment of AECOPD.

Although the comprehensive search will be performed in our study, potential unpublished trials are inevitable. This will introduce some bias.

### Introduction

Chronic Obstructive Pulmonary Disease (COPD) is a common respiratory disease characterized by persistent airflow limitation and abnormal inflammatory response in airways.<sup>1</sup> A recent survey reported that the estimated COPD prevalence was 6.2% in nine Asia-Pacific territories.<sup>2</sup> This condition has resulted in an economic and social burden with the substantial morbidity and mortality worldwide.<sup>3 4</sup> A survey estimates that COPD will become the third leading cause of death worldwide in 2030.<sup>5</sup> Acute exacerbation of COPD is defined as the sustain worsening of the patient's respiratory symptoms beyond normal day-to-day variations.<sup>1</sup> It has a considerable impact on the patients' health status, lung function and even increases the risk of death.<sup>6-8</sup> The clinical guideline recommended pharmacologic therapies for the management of acute exacerbation

1  
2  
3 including bronchodilators, antibiotics, corticosteroids and some other respiratory support. Despite  
4 the effectiveness of these therapies, acute exacerbation still occurs frequently and is significantly  
5 associated with morbidity and mortality.<sup>9</sup> Also, the clinical practice needs to be balanced against  
6 the potential harm of these pharmacotherapies.  
7

8 Chinese herbal medicine is widely prescribed as an adjunct to western medicine to manage  
9 AECOPD in clinical guideline. Six Chinese herb formulas: *Weijing* decoction, *Maxingshigan*  
10 decoction, *Yuebijiabanxia* decoction, *Qingqihuatan* decoction, *Dingchuan* decoction and  
11 *Sangbaipi* decoction are representative recipes to treat AECOPD patients of phlegm-heat  
12 syndromes in Chinese medicine theory.<sup>10-12</sup> Despite the difference of herb ingredients, all these  
13 formulas can be prescribed to clear phlegm-heat symptoms for the patients. They also will be  
14 modified mildly according to additional clinical symptoms. Several systematic reviews  
15 synthesized the effectiveness of single formula.<sup>13 14</sup> However, the paucity of evidence from direct  
16 comparison between these six formulas posed a challenge for clinicians to find the more effective  
17 therapeutic option.  
18

19 Network meta-analysis (NMAs), a newer statistical technique, compared with the traditional  
20 pairwise meta-analysis, can evaluate the relative efficacy of multiple treatment comparisons  
21 including both direct and indirect comparisons.<sup>15-18</sup> The combination of direct and indirect  
22 evidence may improve the precision for the estimated effect size.<sup>15 19-21</sup> The major value of NMAs  
23 is that it can provide the ranking of treatment options according to their effectiveness, which is  
24 important for clinicians to make the best treatment choice.  
25  
26  
27  
28

29 Therefore, we plan to conduct this systematic review and NMAs to compare these six Chinese  
30 herb formulas combined with pharmacotherapy to determine their relative effectiveness and safety  
31 in the treatment of AECOPD.  
32  
33

## 34 **Methods and analysis**

### 35 **Registration**

36 The study protocol has been registered on international prospective register of systematic review  
37 (PROSPERO). The procedure of this protocol will be conducted according to the Preferred  
38 Reporting Item for Systematic Review and Meta-analysis Protocols (PRISMA-P) guidance.<sup>22</sup>  
39

### 40 **Eligibility criteria**

#### 41 **Type of study**

42 We will include all the randomized controlled trials that investigated the effectiveness of six  
43 Chinese herb formulas combined with pharmacotherapy for the treatment of AECOPD.  
44

#### 45 **Participants**

46 Patients must be aged at least 18 years old and diagnosed as acute exacerbation chronic  
47 obstructive pulmonary disease with one or more following symptoms: increased cough frequency,  
48 increased sputum volume, increased dyspnea.<sup>1</sup> We will exclude studies of participants with other  
49 respiratory disease like asthma, bronchiectasia, pulmonary tuberculosis, etc.  
50  
51  
52

#### 53 **Interventions and comparators**

54 Interventions involving the combination of Chinese herb formulas with conventional  
55 pharmacotherapy are eligible. The interested Chinese medicine therapies include the following six  
56 formulas: *Weijing* decoction, *Maxingshigan* decoction, *Yuebijiabanxia* decoction, *Qingqihuatan*  
57  
58  
59  
60

1  
2  
3 decoction, *Dingchuan* decoction and *Sangbaipi* decoction. The same conventional  
4 pharmacotherapy must be used in the comparator arm.

### 5 **Outcome**

6 The primary outcomes include: (1) lung function—forced expiratory volume in 1 second (FEV1);  
7 (2) arterial blood gases—partial pressure of oxygen (PaO<sub>2</sub>) and carbon dioxide (PaCO<sub>2</sub>); (3)  
8 length of hospital stay.

9 The secondary outcomes include: (1) Dyspnoea; (2) health related quality of life; (3) adverse  
10 events.

### 11 **Search strategy**

12 We will perform the comprehensive search in both English and Chinese database involving  
13 PubMed, EMBASE, Cochrane Central Register of Controlled Trials (CENTRAL), CINAHL,  
14 AMED, Chinese Biomedical Database (CBM), Chinese National Knowledge Infrastructure  
15 (CNKI), Chongqing VIP information (CQVIP) and Wanfang database, from their inceptions to  
16 December 2016. The following sources will also be searched to identify clinical trials which are in  
17 progress or completed: ClinicalTrials.gov and WHO clinical trials registry. The additional relevant  
18 studies will also be retrieved from the reference lists of systematic reviews and included studies.  
19 We will map search terms to controlled vocabulary if possible. In addition, the search strategy for  
20 selecting the fields of title, abstract or keyword will be different referring to the characteristics of  
21 databases. Search terms are grouped into three blocks (see table 1).

### 22 **Study selection and data extraction**

23 Literature retrieved citations will be managed by ENDNOTE X6 software. Two independent  
24 reviewers (JL and JZ) will assess the title and abstract of the literature after removing duplications.  
25 The further screening will be performed to select eligible articles by reviewing the full-text. Any  
26 disagreement between the reviewers will be resolved by discussion with a third person (JC). The  
27 selection process will be provided in a PRISMA flow chart (see Figure 1)

28 We will design the standardized database sheet for data extraction. Epidata software 3.1 (The  
29 EpiData Association, Odense, Denmark, 2003-2008) will be used to extract data and check the  
30 consistency of information. The data extraction items include: first author, publication year,  
31 diagnose information, disease duration, stage, sample size, age, details of intervention, control and  
32 outcomes, treatment duration and follow-up period, and adverse events.

### 33 **Risk of bias assessment**

34 The methodological quality of the eligible studies will be evaluated according to the Cochrane  
35 collaboration's risk of bias tool.<sup>23</sup> The assessment details include: sequence generation, allocation  
36 concealment, blinding of participants and personnel, blinding of outcome assessors, incomplete  
37 outcome data, selective reporting and other sources of bias. Each domain will be assessed as 'low  
38 risk' or high risk' or 'unclear risk' according to the description details of eligible studies. Any  
39 discrepancies will be further discussed with a third reviewer (YH).

### 40 **Statistical analysis**

#### 41 **Pairwise meta-analysis**

42 The conventional pairwise meta-analysis will be performed using random-effects model by  
43  
44  
45  
46  
47  
48  
49  
50  
51  
52  
53  
54  
55  
56  
57  
58  
59  
60

1  
2  
3 Revman 5.3 software. Dichotomous data is presented as relative risk (RR) with 95% confidence  
4 interval (CI) and continuous data is reported as mean difference (MD) with 95%CI. The  
5 Chi-square test and  $I^2$  test will be conducted to convey the potential heterogeneity.  
6

### 7 **Network meta-analysis**

8 The network meta-analysis will be conducted in a Bayesian hierarchical framework using the  
9 Markov Chain Monte Carlo (MCMC) algorithm by WinBUGS 1.4.3 software (MRC Biostatistics  
10 Unit, Cambridge, UK).<sup>24</sup> The statistical heterogeneity of entire NMAs will be investigated by the  
11 magnitude of heterogeneity variance ( $\tau^2$ ) estimated from the NMAs model.<sup>25</sup> If the direct evidence  
12 is available, the combined estimation will be provided for NMAs. There are several methods to  
13 evaluate the potential difference in treatment effect estimated by direct and indirect  
14 comparisons.<sup>26-29</sup> We will apply node splitting method to explore the inconsistency of the model.  
15  
16 <sup>26</sup> <sup>30</sup>The deviance information criterion (DIC) will be used to assess the model fitness by  
17 comparing the fixed and random effects model, and the lower DIC is preferred.<sup>31</sup> To rank the  
18 probabilities of the best intervention for various treatments, we will use SUCRA and the mean  
19 ranks.<sup>32</sup> SUCRA will be described with percentages, and larger values indicate the better ranks for  
20 the treatment. The generation of NMAs graphs and result figures will be performed by Stata  
21 software (version 12; Stata Corporation, College Station, Texas, USA). If the data are not  
22 available for quantitative analysis, we will describe and summarize the evidence.  
23  
24  
25  
26

### 27 **Sensitivity analysis and subgroup analysis**

28 The strategies employed to address the heterogeneity of pair-wise meta-analysis also can be used  
29 in network analysis to tackle inconsistency.<sup>15</sup> If the heterogeneity or inconsistency among the  
30 studies was detected, subgroup analysis will be conducted according to the effect modifiers,  
31 including sample size, severity of COPD, treatment duration et al. Also, the network  
32 meta-regression will be performed to explore the possible sources of inconsistency.<sup>33</sup> We will  
33 perform the sensitivity analysis to explore the robust conclusions of primary outcomes if feasible.  
34 Different levels of the methodological quality of studies will influence the overall effects.  
35 Sensitivity analysis will be conducted by removing trails that report the non-random sequence  
36 generation.  
37  
38  
39  
40

### 41 **Publication bias**

42 Egger's regression test will be performed to assess the publication bias of the included studies. If  
43 feasible, we will also convey whether the small study effects exist in a network of interventions by  
44 the statistical model.<sup>34</sup>  
45  
46

### 47 **Quality of evidence**

48 We will also assess the quality of evidence for the main outcomes with the GRADE approach (the  
49 Grading of Recommendations Assessment, Development and Evaluation).<sup>35</sup> The five items will be  
50 investigated, including limitations in study design, inconsistency, imprecision, indirectness and  
51 publication bias.  
52  
53  
54

### 55 **Ethics and dissemination**

56 This review doesn't require the ethical approval since the study bases on the published evidence.  
57 The results of network meta-analysis will be reported according to the PRISMA extension  
58  
59  
60



statement for reporting of systematic reviews incorporating network meta-analysis, and submitted to a peer-review journal.<sup>36</sup>

### Contributors

SL, XG and LW conceived and designed this study. SL and JC drafted the protocol. JL and JZ will conduct the search, data screening and extraction. SL, JC, YH, LW, LY and XG have critically reviewed the manuscript and approved it for publication.

### Conflicts of interest

None declared

### Provenance and peer review

Not commissioned; externally peer reviewed

### Funding

This study is supported by Guangdong Provincial Department of Science and Technology, Guangdong, China (the Project Grant No. 2014A020221020) and Clinical Research Special Project of Guangdong Provincial Hospital of Chinese Medicine (Grant number YN2014LN10)

### Reference

1. Global Strategy for the Diagnosis, Management and Prevention of COPD, Global Initiative for Chronic Obstructive Lung Disease (GOLD) 2016. <http://www.goldcopd.org>.
2. Lim S, Lam DC, Muttalif AR, et al. Impact of chronic obstructive pulmonary disease (COPD) in the Asia-Pacific region: the EPIC Asia population-based survey. *Asia Pacific family medicine*. 2015;14(1):4.
3. Lopez AD, Shibuya K, Rao C, et al. Chronic obstructive pulmonary disease: current burden and future projections. *The European respiratory journal*. 2006;27(2):397-412.
4. Mathers CD, Loncar D. Projections of global mortality and burden of disease from 2002 to 2030. *PLoS medicine*. 2006;3(11):e442.
5. World Health Organization. Chronic respiratory diseases, burden of chronic obstructive pulmonary disease. Available from URL: <http://www.who.int/respiratory/copd/burden/en>.
6. Spencer S, Jones PW. Time course of recovery of health status following an infective exacerbation of chronic bronchitis. *Thorax*. 2003;58(7):589-93.
7. Suissa S, Dell'Aniello S, Ernst P. Long-term natural history of chronic obstructive pulmonary disease: severe exacerbations and mortality. *Thorax*. 2012;67(11):957-63.
8. Celli BR, Thomas NE, Anderson JA, et al. Effect of pharmacotherapy on rate of decline of lung function in chronic obstructive pulmonary disease: results from the TORCH study. *American journal of respiratory and critical care medicine*. 2008;178(4):332-8.
9. Ko FW, Chan KP, Hui DS, et al. Acute exacerbation of COPD. *Respirology (Carlton, Vic)*. 2016;21(7):1152-65.
10. Chinese Academy of Chinese Medical Sciences. (2011) Evidence-Based Guidelines of Clinical Practice in Chinese Medicine [in Chinese: 中医循证临床实践指南]. Chinese Academy of Chinese

1  
2  
3 Medical Sciences Publishing House, Beijing, People's Republic of China.

4 11. China Association of Chinese Medicine. Guideline for diagnosis and treatment of common  
5 internal disease in Chinese medicine: Symptoms in Chinese medicine (2008). China Press of  
6 Traditional Chinese Medicine, Beijing, People's Republic of China.

7 12. China Association of Chinese Medicine. Guideline for diagnosis and treatment of common  
8 internal disease in Chinese medicine: Diseases of modern medicine (2008). China Press of Traditional  
9 Chinese Medicine, Beijing, People's Republic of China.

10 13. Liu S, Shergis J, Chen X, et al. Chinese herbal medicine (weijing decoction) combined with  
11 pharmacotherapy for the treatment of acute exacerbations of chronic obstructive pulmonary disease.  
12 Evidence-based complementary and alternative medicine : eCAM. 2014;2014:257012.

13 14. Yang XY, Yang ZL, Huang FH, et al. Therapeutic effect and symptom changes of phlegm-clearing  
14 decoction combined with western medicine for COPD with acute exacerbation: a systematic review  
15 and meta-analysis. Chinese Archives of Traditional Chinese Medicine. 2016;34(4):860-3.

16 15. Cipriani A, Higgins JP, Geddes JR, et al. Conceptual and technical challenges in network  
17 meta-analysis. Annals of internal medicine. 2013;159(2):130-7.

18 16. Jansen JP, Crawford B, Bergman G, et al. Bayesian meta-analysis of multiple treatment  
19 comparisons: an introduction to mixed treatment comparisons. Value in health : the journal of the  
20 International Society for Pharmacoeconomics and Outcomes Research. 2008;11(5):956-64.

21 17. Salanti G, Higgins JP, Ades AE, et al. Evaluation of networks of randomized trials. Statistical  
22 methods in medical research. 2008;17(3):279-301.

23 18. Lu G, Ades AE. Combination of direct and indirect evidence in mixed treatment comparisons.  
24 Statistics in medicine. 2004;23(20):3105-24.

25 19. Bucher HC, Guyatt GH, Griffith LE, et al. The results of direct and indirect treatment  
26 comparisons in meta-analysis of randomized controlled trials. Journal of clinical epidemiology.  
27 1997;50(6):683-91.

28 20. Hasselblad V. Meta-analysis of multitreatment studies. Medical decision making : an international  
29 journal of the Society for Medical Decision Making. 1998;18(1):37-43.

30 21. Caldwell DM, Ades AE, Higgins JP. Simultaneous comparison of multiple treatments: combining  
31 direct and indirect evidence. BMJ (Clinical research ed). 2005;331(7521):897-900.

32 22. Moher D, Shamseer L, Clarke M, et al. Preferred reporting items for systematic review and  
33 meta-analysis protocols (PRISMA-P) 2015 statement. Systematic reviews. 2015;4:1.

34 23. Higgins JP GS. Cochrane handbook for systematic reviews of interventions Version 5.1.0. 2011.  
35 <http://www.handbook.cochrane.org>.

36 24. Lunn DJ, Thomas A, Best N, et al. WinBUGS - A Bayesian modelling framework: Concepts,  
37 structure, and extensibility. Statistics and Computing. 2000;10(4):325-37.

38 25. Jackson D, Barrett JK, Rice S, et al. A design-by-treatment interaction model for network  
39 meta-analysis with random inconsistency effects. Statistics in medicine. 2014;33(21):3639-54.

40 26. Dias S, Welton NJ, Caldwell DM, et al. Checking consistency in mixed treatment comparison  
41 meta-analysis. Statistics in medicine. 2010;29(7-8):932-44.

42 27. Lu G, Welton NJ, Higgins JP, et al. Linear inference for mixed treatment comparison  
43 meta-analysis: A two-stage approach. Research synthesis methods. 2011;2(1):43-60.

44 28. Song F, Altman DG, Glenny AM, et al. Validity of indirect comparison for estimating efficacy of  
45 competing interventions: empirical evidence from published meta-analyses. BMJ (Clinical research ed).  
46 2003;326(7387):472.

- 1  
2  
3 29. Krahn U, Binder H, König J. A graphical tool for locating inconsistency in network meta-analyses. *BMC medical research methodology*. 2013;13:35.  
4  
5  
6 30. Lu G, Ades AE. Assessing Evidence Inconsistency in Mixed Treatment Comparisons. *Journal of*  
7 *the American Statistical Association*. 2006;101(474):447-59.  
8  
9 31. Spiegelhalter DJ, Best NG, Carlin BP, et al. Bayesian measures of model complexity and fit. *Journal of the Royal Statistical Society*. 2002;64(4):583-639.  
10  
11 32. Salanti G, Ades AE, Ioannidis JP. Graphical methods and numerical summaries for presenting  
12 results from multiple-treatment meta-analysis: an overview and tutorial. *Journal of clinical*  
13 *epidemiology*. 2011;64(2):163-71.  
14  
15 33. Salanti G, Marinho V, Higgins JP. A case study of multiple-treatments meta-analysis demonstrates  
16 that covariates should be considered. *Journal of clinical epidemiology*. 2009;62(8):857-64.  
17  
18 34. Chaimani A, Salanti G. Using network meta-analysis to evaluate the existence of small-study  
19 effects in a network of interventions. *Research synthesis methods*. 2012;3(2):161-76.  
20  
21 35. Salanti G, Del Giovane C, Chaimani A, et al. Evaluating the quality of evidence from a network  
22 meta-analysis. *PloS one*. 2014;9(7):e99682.  
23  
24 36. Hutton B, Salanti G, Caldwell DM, et al. The PRISMA extension statement for reporting of  
25 systematic reviews incorporating network meta-analyses of health care interventions: checklist and  
26 explanations. *Annals of internal medicine*. 2015;162(11):777-84.  
27  
28  
29  
30  
31  
32  
33  
34  
35  
36  
37  
38  
39  
40  
41  
42  
43  
44  
45  
46  
47  
48  
49  
50  
51  
52  
53  
54  
55  
56  
57  
58  
59  
60

Table 1 Search terms

| Search block | Search terms                                                                                                                                                                                                                                                                                                                                                                                                                                        |
|--------------|-----------------------------------------------------------------------------------------------------------------------------------------------------------------------------------------------------------------------------------------------------------------------------------------------------------------------------------------------------------------------------------------------------------------------------------------------------|
| Participants | Pulmonary Disease, Chronic Obstructive OR Bronchitis, Chronic OR Pulmonary Emphysema OR Emphysema OR COPD OR Chronic Obstructive Pulmonary OR COAD OR Chronic Obstructive Airway OR Chronic Obstructive Lung OR Chronic obstructive bronchopulmonary OR Chronic obstructive respiratory OR Chronic Airflow Obstruction OR Chronic Airflow Obstructive OR Chronic bronchitis OR Pulmonary emphysema OR Lung emphysema OR Chronic Airflow limitation. |
| Intervention | weijing decoction OR weijing tang OR sangbaipi decoction OR sangbaipi tang OR maxingshigan decoction OR maxingshigan tang OR yuebijiabanxia decoction OR yuebijiabanxia tang OR dingchuan decoction OR dingchuan tang OR qingqihuatan decoction OR qingqihuatan tang OR qingqihuatan pill                                                                                                                                                           |
| Study design | Randomized controlled trial OR controlled clinical trial OR randomized OR placebo OR drug therapy OR randomly OR trial OR groups                                                                                                                                                                                                                                                                                                                    |

1  
2  
3  
4  
5  
6  
7  
8  
9  
10  
11  
12  
13  
14  
15  
16  
17  
18  
19  
20  
21  
22  
23  
24  
25  
26  
27  
28  
29  
30  
31  
32  
33  
34  
35  
36  
37  
38  
39  
40  
41  
42  
43  
44  
45  
46  
47  
48  
49  
50  
51  
52  
53  
54  
55  
56  
57  
58  
59  
60

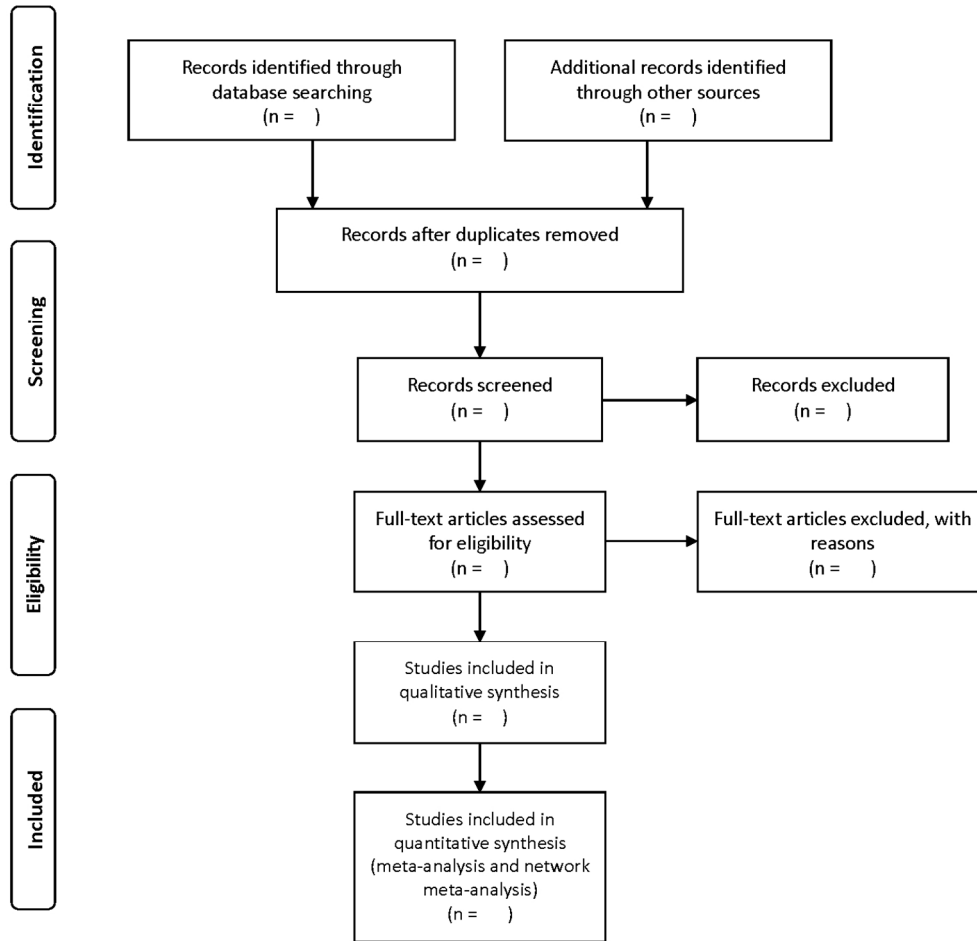

126x121mm (300 x 300 DPI)

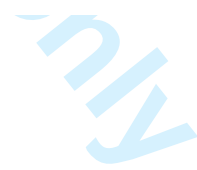

**PRISMA-P (Preferred Reporting Items for Systematic review and Meta-Analysis Protocols) 2015 checklist: recommended items to address in a systematic review protocol\***

| Section and topic                 | Item No | Checklist item                                                                                                                                                                                                                | Reported on page# |
|-----------------------------------|---------|-------------------------------------------------------------------------------------------------------------------------------------------------------------------------------------------------------------------------------|-------------------|
| <b>ADMINISTRATIVE INFORMATION</b> |         |                                                                                                                                                                                                                               |                   |
| Title:                            |         |                                                                                                                                                                                                                               |                   |
| Identification                    | 1a      | Identify the report as a protocol of a systematic review                                                                                                                                                                      | 1                 |
| Update                            | 1b      | If the protocol is for an update of a previous systematic review, identify as such                                                                                                                                            |                   |
| Registration                      | 2       | If registered, provide the name of the registry (such as PROSPERO) and registration number                                                                                                                                    | 2                 |
| Authors:                          |         |                                                                                                                                                                                                                               |                   |
| Contact                           | 3a      | Provide name, institutional affiliation, e-mail address of all protocol authors; provide physical mailing address of corresponding author                                                                                     | 1                 |
| Contributions                     | 3b      | Describe contributions of protocol authors and identify the guarantor of the review                                                                                                                                           | 6                 |
| Amendments                        | 4       | If the protocol represents an amendment of a previously completed or published protocol, identify as such and list changes; otherwise, state plan for documenting important protocol amendments                               | NA                |
| Support:                          |         |                                                                                                                                                                                                                               |                   |
| Sources                           | 5a      | Indicate sources of financial or other support for the review                                                                                                                                                                 | 6                 |
| Sponsor                           | 5b      | Provide name for the review funder and/or sponsor                                                                                                                                                                             | 6                 |
| Role of sponsor or funder         | 5c      | Describe roles of funder(s), sponsor(s), and/or institution(s), if any, in developing the protocol                                                                                                                            | 6                 |
| <b>INTRODUCTION</b>               |         |                                                                                                                                                                                                                               |                   |
| Rationale                         | 6       | Describe the rationale for the review in the context of what is already known                                                                                                                                                 | 2-3               |
| Objectives                        | 7       | Provide an explicit statement of the question(s) the review will address with reference to participants, interventions, comparators, and outcomes (PICO)                                                                      | 2-3               |
| <b>METHODS</b>                    |         |                                                                                                                                                                                                                               |                   |
| Eligibility criteria              | 8       | Specify the study characteristics (such as PICO, study design, setting, time frame) and report characteristics (such as years considered, language, publication status) to be used as criteria for eligibility for the review | 3-4               |
| Information sources               | 9       | Describe all intended information sources (such as electronic databases, contact with study authors, trial registers or other grey literature sources) with planned dates of coverage                                         | 4                 |
| Search strategy                   | 10      | Present draft of search strategy to be used for at least one electronic database, including planned limits, such that it could be repeated                                                                                    | 4                 |

|                                    |     |                                                                                                                                                                                                                                                  |     |
|------------------------------------|-----|--------------------------------------------------------------------------------------------------------------------------------------------------------------------------------------------------------------------------------------------------|-----|
| Study records:                     |     |                                                                                                                                                                                                                                                  |     |
| Data management                    | 11a | Describe the mechanism(s) that will be used to manage records and data throughout the review                                                                                                                                                     | 4   |
| Selection process                  | 11b | State the process that will be used for selecting studies (such as two independent reviewers) through each phase of the review (that is, screening, eligibility and inclusion in meta-analysis)                                                  | 4   |
| Data collection process            | 11c | Describe planned method of extracting data from reports (such as piloting forms, done independently, in duplicate), any processes for obtaining and confirming data from investigators                                                           | 4   |
| Data items                         | 12  | List and define all variables for which data will be sought (such as PICO items, funding sources), any pre-planned data assumptions and simplifications                                                                                          | 4   |
| Outcomes and prioritization        | 13  | List and define all outcomes for which data will be sought, including prioritization of main and additional outcomes, with rationale                                                                                                             | 4   |
| Risk of bias in individual studies | 14  | Describe anticipated methods for assessing risk of bias of individual studies, including whether this will be done at the outcome or study level, or both; state how this information will be used in data synthesis                             | 4   |
| Data synthesis                     | 15a | Describe criteria under which study data will be quantitatively synthesised                                                                                                                                                                      | 4-5 |
|                                    | 15b | If data are appropriate for quantitative synthesis, describe planned summary measures, methods of handling data and methods of combining data from studies, including any planned exploration of consistency (such as $I^2$ , Kendall's $\tau$ ) | 4-5 |
|                                    | 15c | Describe any proposed additional analyses (such as sensitivity or subgroup analyses, meta-regression)                                                                                                                                            | 5   |
|                                    | 15d | If quantitative synthesis is not appropriate, describe the type of summary planned                                                                                                                                                               | 5   |
| Meta-bias(es)                      | 16  | Specify any planned assessment of meta-bias(es) (such as publication bias across studies, selective reporting within studies)                                                                                                                    | 5   |
| Confidence in cumulative evidence  | 17  | Describe how the strength of the body of evidence will be assessed (such as GRADE)                                                                                                                                                               | 5   |

**\* It is strongly recommended that this checklist be read in conjunction with the PRISMA-P Explanation and Elaboration (cite when available) for important clarification on the items. Amendments to a review protocol should be tracked and dated. The copyright for PRISMA-P (including checklist) is held by the PRISMA-P Group and is distributed under a Creative Commons Attribution Licence 4.0.**

*From: Shamseer L, Moher D, Clarke M, Ghersi D, Liberati A, Petticrew M, Shekelle P, Stewart L, PRISMA-P Group. Preferred reporting items for systematic review and meta-analysis protocols (PRISMA-P) 2015: elaboration and explanation. BMJ. 2015 Jan 2;349(jan02 1):g7647.*

# BMJ Open

## Comparative Effectiveness of Six Chinese Herb Formulas for Acute Exacerbation of Chronic Obstructive Pulmonary Disease: Protocol for Systematic Review and Network Meta-analysis

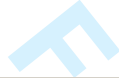

|                                 |                                                                                                                                                                                                                                                                                                                                                                                                                                                                                                                                                                                                                                                                                                                                                                                                                                                                                                                                                                                                                                                                                                                                                                                                                                                                                                                                                                                                                                                                           |
|---------------------------------|---------------------------------------------------------------------------------------------------------------------------------------------------------------------------------------------------------------------------------------------------------------------------------------------------------------------------------------------------------------------------------------------------------------------------------------------------------------------------------------------------------------------------------------------------------------------------------------------------------------------------------------------------------------------------------------------------------------------------------------------------------------------------------------------------------------------------------------------------------------------------------------------------------------------------------------------------------------------------------------------------------------------------------------------------------------------------------------------------------------------------------------------------------------------------------------------------------------------------------------------------------------------------------------------------------------------------------------------------------------------------------------------------------------------------------------------------------------------------|
| Journal:                        | <i>BMJ Open</i>                                                                                                                                                                                                                                                                                                                                                                                                                                                                                                                                                                                                                                                                                                                                                                                                                                                                                                                                                                                                                                                                                                                                                                                                                                                                                                                                                                                                                                                           |
| Manuscript ID                   | bmjopen-2017-017099.R1                                                                                                                                                                                                                                                                                                                                                                                                                                                                                                                                                                                                                                                                                                                                                                                                                                                                                                                                                                                                                                                                                                                                                                                                                                                                                                                                                                                                                                                    |
| Article Type:                   | Protocol                                                                                                                                                                                                                                                                                                                                                                                                                                                                                                                                                                                                                                                                                                                                                                                                                                                                                                                                                                                                                                                                                                                                                                                                                                                                                                                                                                                                                                                                  |
| Date Submitted by the Author:   | 15-Jun-2017                                                                                                                                                                                                                                                                                                                                                                                                                                                                                                                                                                                                                                                                                                                                                                                                                                                                                                                                                                                                                                                                                                                                                                                                                                                                                                                                                                                                                                                               |
| Complete List of Authors:       | Liu, Shaonan; Guangdong Provincial Hospital of Chinese Medicine, Evidence-based Medicine and Clinical research Serve Group; The Second Clinical College of Guangzhou University of Chinese Medicine, Chen, Jing; Guangdong Provincial Hospital of Chinese Medicine, Evidence-based Medicine and Clinical research Serve Group; The Second Clinical College of Guangzhou University of Chinese Medicine, He, Yihan; Guangdong Provincial Hospital of Chinese Medicine, Evidence-based Medicine & Clinical Research Service Group; The Second Clinical College of Guangzhou University of Chinese Medicine Wu, Lei; Guangdong Provincial Hospital of Chinese Medicine, Respiratory department; The Second Clinical College of Guangzhou University of Chinese Medicine, Lai, Jiaqi; Guangdong Provincial Hospital of Chinese Medicine, Evidence-based Medicine and Clinical research Serve Group; The Second Clinical College of Guangzhou University of Chinese Medicine, Zuo, Jinhong; The Second Clinical College of Guangzhou University of Chinese Medicine, Yang, Lihong; Guangdong Provincial Hospital of Chinese Medicine, Evidence-based Medicine and Clinical research Service Group; The Second Clinical College of Guangzhou University of Chinese Medicine Guo, Xinfeng; Guangdong Provincial Hospital of Chinese Medicine, Evidence-based Medicine and Clinical research Serve Group; The Second Clinical College of Guangzhou University of Chinese Medicine |
| <b>Primary Subject Heading</b>: | Complementary medicine                                                                                                                                                                                                                                                                                                                                                                                                                                                                                                                                                                                                                                                                                                                                                                                                                                                                                                                                                                                                                                                                                                                                                                                                                                                                                                                                                                                                                                                    |
| Secondary Subject Heading:      | Respiratory medicine                                                                                                                                                                                                                                                                                                                                                                                                                                                                                                                                                                                                                                                                                                                                                                                                                                                                                                                                                                                                                                                                                                                                                                                                                                                                                                                                                                                                                                                      |
| Keywords:                       | Chinese herb formula, Acute Exacerbation Chronic Obstructive Pulmonary Disease (AECOPD), systematic review, network meta-analysis                                                                                                                                                                                                                                                                                                                                                                                                                                                                                                                                                                                                                                                                                                                                                                                                                                                                                                                                                                                                                                                                                                                                                                                                                                                                                                                                         |
|                                 |                                                                                                                                                                                                                                                                                                                                                                                                                                                                                                                                                                                                                                                                                                                                                                                                                                                                                                                                                                                                                                                                                                                                                                                                                                                                                                                                                                                                                                                                           |

SCHOLARONE™  
Manuscripts



1  
2  
3  
4  
5  
6  
7  
8  
9  
10  
11  
12  
13  
14  
15  
16  
17  
18  
19  
20  
21  
22  
23  
24  
25  
26  
27  
28  
29  
30  
31  
32  
33  
34  
35  
36  
37  
38  
39  
40  
41  
42  
43  
44  
45  
46  
47  
48  
49  
50  
51  
52  
53  
54  
55  
56  
57  
58  
59  
60

## Comparative Effectiveness of Six Chinese Herb Formulas for Acute Exacerbation of Chronic Obstructive Pulmonary Disease: Protocol for Systematic Review and Network Meta-analysis

Shaonan Liu<sup>1,2,3,4</sup>, Jing Chen<sup>1,2,3,4</sup>, Yihan He<sup>1,2,3,4</sup>, Lei Wu<sup>1,2,3,4</sup>, Jiaqi Lai<sup>1,2,3,4</sup>, Jinhong Zuo<sup>2</sup>, Lihong Yang<sup>1,2,3,4</sup>, Xinfeng Guo<sup>1,2,3,4\*</sup>

1. Guangdong Provincial Hospital of Chinese Medicine, Guangzhou, China.
2. The Second Clinical College of Guangzhou University of Chinese Medicine, Guangzhou, China.
3. The Second Affiliated Hospital of Guangzhou University of Chinese Medicine, Guangzhou, China.
4. Guangdong Provincial Academy of Chinese Medical Sciences, Guangzhou, China.

Email:

Shaonan Liu: [shaonan819@sina.com](mailto:shaonan819@sina.com)

Jing Chen: [576215023@qq.com](mailto:576215023@qq.com)

Yihan He: [yihanhe@126.com](mailto:yihanhe@126.com)

Lei Wu: [drleiwu@163.com](mailto:drleiwu@163.com)

Jiaqi Lai: [2287028962@qq.com](mailto:2287028962@qq.com)

Jinhong Zuo: [15297775314@163.com](mailto:15297775314@163.com)

Lihong Yang: [lihongyanggd@yeah.net](mailto:lihongyanggd@yeah.net)

Xinfeng Guo: [guoxinfeng@139.com](mailto:guoxinfeng@139.com)

Corresponding author: Xinfeng Guo

Address: No. 111, Dade Road, Guangzhou, China, postbox 510120

Tel: +8613678906862

Fax number: 00862081887233\*35842

Keywords: Chinese herb formula, Acute Exacerbation Chronic Obstructive Pulmonary Disease (AECOPD), systematic review, network meta-analysis

Word count: 2166

## Abstract

### Introduction

Chinese medicine is commonly used to combine with pharmacotherapy for the treatment of acute exacerbation of chronic obstructive pulmonary disease (AECOPD). Six Chinese herb formulas involving *Weijing* decoction, *Maxingshigan* decoction, *Yuebijiabanxia* decoction, *Qingqihuatan* decoction, *Dingchuan* decoction and *Sangbaipi* decoction are recommended in Chinese medicine clinical guideline or text book, to relieve patients with phlegm-heat according to Chinese syndrome differentiation. However, the comparative effectiveness among these six formulas has not been investigated in published randomized controlled trials. We plan to summarize the direct and indirect evidence for these six formulas combined with pharmacotherapy to determine the relative merits options for the management of AECOPD.

### Methods and analysis

We will perform the comprehensive search for the randomized controlled trials to evaluate the effectiveness of six Chinese herb formulas recommended in Chinese medicine clinical guideline or text book. The combination of pharmacotherapy includes bronchodilators, antibiotics and corticosteroids that are routinely prescribed for AECOPD. The primary outcome will be lung function, arterial blood gases and length of hospital stay. The data screening and extraction will be conducted by two different reviewers. The quality of RCT will be assessed according to the Cochrane handbook risk of bias tool. The Bayes of network meta-analysis will be conducted with winBUGS to compare the effectiveness of six formulas. We will also use the Surface Under the Cumulative Ranking Curve (SUCRA) to obtain the comprehensive rank for these treatments.

### Ethics and dissemination

This review does not require ethics approval and the results of network meta-analysis will be submitted to a peer-review journal.

**Protocol registration number:** PROSPERO CRD42016052699

### The strength and limitations of the study

This study will be the first meta-analysis to compare the Chinese herb formula combined with pharmacotherapy for AECOPD.

The results of this study will provide the additional evidence for the clinical guideline and help the clinical practitioners to make decision for the treatment of AECOPD.

Although the comprehensive search will be performed in our study, potential unpublished trials are inevitable. This will introduce some bias.

### Introduction

Chronic Obstructive Pulmonary Disease (COPD) is a common respiratory disease characterized by persistent airflow limitation and abnormal inflammatory response in airways.<sup>1</sup> A recent survey reported that the estimated COPD prevalence was 6.2% in nine Asia-Pacific territories.<sup>2</sup> This condition has resulted in an economic and social burden with the substantial morbidity and mortality worldwide.<sup>3 4</sup> A survey estimates that COPD will become the third leading cause of death worldwide in 2030.<sup>5</sup> Acute exacerbation of COPD is defined as the sustain worsening of the patient's respiratory symptoms beyond normal day-to-day variations.<sup>1</sup> It has a considerable impact on the patients' health status, lung function and even increases the risk of death.<sup>6-8</sup> The clinical guideline recommended pharmacologic therapies for the management of acute exacerbation

1  
2  
3 including bronchodilators, antibiotics, corticosteroids and some other respiratory support. Despite  
4 the effectiveness of these therapies, acute exacerbation still occurs frequently and is significantly  
5 associated with morbidity and mortality.<sup>9</sup> Moreover, these therapies have been associated with  
6 some side effects such as tremor, hyperglycaemia, candidiasis and antibiotic resistance.<sup>9</sup>  
7 Clinicians should balance the effectiveness and safety of these pharmaceutical interventions for  
8 patients.  
9

10 Chinese herb medicine is widely prescribed as an adjunct to western medicine to manage  
11 AECOPD in clinical guideline. Although CHM is not the mainstream for treating COPD, it has  
12 become increasingly accepted as a form of complementary or alternative medicine in western  
13 countries.<sup>10</sup> Chinese herb formulas combined with routine pharmacotherapy have showed the  
14 promising benefits on lung function, arterial blood gases, St George's Respiratory Questionnaire  
15 (SGRQ) scoring, and 6-Minute Walk Test (6MWT) when compared with routine pharmacotherapy  
16 alone.<sup>11 12</sup> Six Chinese herb formulas: *Weijing* decoction, *Maxingshigan* decoction, *Yuebijiabanxia*  
17 decoction, *Qingqihuatan* decoction, *Dingchuan* decoction and *Sangbaipi* decoction are  
18 representative recipes to treat AECOPD patients of phlegm-heat syndromes in Chinese medicine  
19 theory.<sup>13-15</sup> Despite the difference of herb ingredients, all these formulas can be prescribed to clear  
20 phlegm-heat symptoms for the patients. They also will be modified mildly according to additional  
21 clinical symptoms. These formulas or active compounds of herb ingredients also show the effects  
22 on anti-inflammation, anti-oxidative stress and improve immune function which may shorten  
23 recovery time and reduce recurrence of AECOPD.<sup>16-21</sup> Several systematic reviews synthesized the  
24 effectiveness of single formula.<sup>12 22</sup> However, the paucity of evidence from direct comparison  
25 between these six formulas posed a challenge for clinicians to find the more effective therapeutic  
26 option.  
27

28 Network meta-analysis (NMAs), a newer statistical technique, compared with the traditional  
29 pairwise meta-analysis, can evaluate the relative efficacy of multiple treatment comparisons  
30 including both direct and indirect comparisons.<sup>23-26</sup> The combination of direct and indirect  
31 evidence may improve the precision for the estimated effect size.<sup>23 27-29</sup> The major value of NMAs  
32 is that it can provide the ranking of treatment options according to their effectiveness, which is  
33 important for clinicians to make the best treatment choice.  
34

35 Therefore, we plan to conduct this systematic review and NMAs to compare these six Chinese  
36 herb formulas combined with pharmacotherapy to determine their relative effectiveness and safety  
37 in the treatment of AECOPD.  
38

## 39 **Methods and analysis**

### 40 **Registration**

41 The study protocol has been registered on international prospective register of systematic review  
42 (PROSPERO). The procedure of this protocol will be conducted according to the Preferred  
43 Reporting Item for Systematic Review and Meta-analysis Protocols (PRISMA-P) guidance.<sup>30</sup>  
44

### 45 **Eligibility criteria**

#### 46 **Type of study**

47 We will include all the randomized controlled trials that investigated the effectiveness of six  
48 Chinese herb formulas combined with pharmacotherapy for the treatment of AECOPD.  
49  
50  
51  
52  
53  
54  
55  
56  
57  
58  
59  
60

### Participants

COPD should be confirmed according to the standard diagnostic criteria including the Global Initiative for Chronic Obstructive Lung Disease [GOLD];<sup>1</sup> the British Thoracic Society, the American Thoracic Society, the European Respiratory Society or Chinese COPD guideline.<sup>31</sup>

Patients must be aged at least 18 years old and diagnosed as acute exacerbation chronic obstructive pulmonary disease with one or more following symptoms: increased cough frequency, increased sputum volume, increased dyspnea.<sup>1</sup> We will exclude studies of participants with other respiratory disease like asthma, bronchiectasia, pulmonary tuberculosis, etc.

### Interventions and comparators

Interventions involving the combination of Chinese herb formulas with conventional pharmacotherapy are eligible. The interested Chinese medicine therapies include the following six formulas: *Weijing* decoction, *Maxingshigan* decoction, *Yuebijiabanxia* decoction, *Qingqihuatan* decoction, *Dingchuan* decoction and *Sangbaipi* decoction. The same conventional pharmacotherapy must be used in the comparator arm.

### Outcome

The primary outcomes include: (1) lung function—forced expiratory volume in 1 second (FEV1); (2) arterial blood gases—partial pressure of oxygen (PaO<sub>2</sub>) and carbon dioxide (PaCO<sub>2</sub>); (3) length of hospital stay.

The secondary outcomes include: (1) Dyspnoea; (2) health related quality of life; (3) hospital readmission for acute exacerbation; (4) effective rate;<sup>32</sup> (5) adverse events.

### Search strategy

We will perform the comprehensive search in both English and Chinese database involving PubMed, EMBASE, Cochrane Central Register of Controlled Trials (CENTRAL), CINAHL, AMED, Chinese Biomedical Database (CBM), Chinese National Knowledge Infrastructure (CNKI), Chongqing VIP information (CQVIP) and Wanfang database, from their inceptions to December 2016. The following sources will also be searched to identify clinical trials which are in progress or completed: ClinicalTrials.gov and WHO clinical trials registry. The additional relevant studies will also be retrieved from the reference lists of systematic reviews and included studies. We will map search terms to controlled vocabulary if possible. In addition, the search strategy for selecting the fields of title, abstract or keyword will be different referring to the characteristics of databases. Search terms are grouped into three blocks (see table 1).

**Table 1** Search terms

| Search block | Search terms                                                                                                                                                                                                                                                                                                                                                                                                                                        |
|--------------|-----------------------------------------------------------------------------------------------------------------------------------------------------------------------------------------------------------------------------------------------------------------------------------------------------------------------------------------------------------------------------------------------------------------------------------------------------|
| Participants | Pulmonary Disease, Chronic Obstructive OR Bronchitis, Chronic OR Pulmonary Emphysema OR Emphysema OR COPD OR Chronic Obstructive Pulmonary OR COAD OR Chronic Obstructive Airway OR Chronic Obstructive Lung OR Chronic obstructive bronchopulmonary OR Chronic obstructive respiratory OR Chronic Airflow Obstruction OR Chronic Airflow Obstructive OR Chronic bronchitis OR Pulmonary emphysema OR Lung emphysema OR Chronic Airflow limitation. |

|              |                                                                                                                                                                                                                                                                                           |
|--------------|-------------------------------------------------------------------------------------------------------------------------------------------------------------------------------------------------------------------------------------------------------------------------------------------|
| Intervention | weijing decoction OR weijing tang OR sangbaipi decoction OR sangbaipi tang OR maxingshigan decoction OR maxingshigan tang OR yuebijiabanxia decoction OR yuebijiabanxia tang OR dingchuan decoction OR dingchuan tang OR qingqihuatan decoction OR qingqihuatan tang OR qingqihuatan pill |
| Study design | Randomized controlled trial OR controlled clinical trial OR randomized OR placebo OR drug therapy OR randomly OR trial OR groups                                                                                                                                                          |

### Study selection and data extraction

Literature retrieved citations will be managed by ENDNOTE X6 software. Two independent reviewers (JL and JZ) will assess the title and abstract of the literature after removing duplications. The further screening will be performed to select eligible articles by reviewing the full-text. Any disagreement between the reviewers will be resolved by discussion with a third person (JC). The selection process will be provided in a PRISMA flow chart (see Figure 1)

We will design the standardized database sheet for data extraction. Epidata software 3.1 (The EpiData Association, Odense, Denmark, 2003-2008) will be used to extract data and check the consistency of information. The data extraction items include: first author, publication year, diagnose information, disease duration, stage, sample size, age, details of intervention, control and outcomes, treatment duration and follow-up period, and adverse events.

### Risk of bias assessment

The methodological quality of the eligible studies will be evaluated according to the Cochrane collaboration's risk of bias tool.<sup>33</sup> The assessment details include: sequence generation, allocation concealment, blinding of participants and personnel, blinding of outcome assessors, incomplete outcome data, selective reporting and other sources of bias. Each domain will be assessed as 'low risk' or high risk' or 'unclear risk' according to the description details of eligible studies. Any discrepancies will be further discussed with a third reviewer (YH).

### Statistical analysis

#### Pairwise meta-analysis

The conventional pairwise meta-analysis will be performed using random-effects model by Revman 5.3 software. Dichotomous data is presented as relative risk (RR) with 95% confidence interval (CI) and continuous data is reported as mean difference (MD) with 95%CI. The Chi-square test and  $I^2$  test will be conducted to convey the potential heterogeneity.

#### Network meta-analysis

The network meta-analysis will be conducted in a Bayesian hierarchical framework using the Markov Chain Monte Carlo (MCMC) algorithm by WinBUGS 1.4.3 software (MRC Biostatistics Unit, Cambridge, UK).<sup>34</sup> The statistical heterogeneity of entire NMAs will be investigated by the magnitude of heterogeneity variance ( $\tau^2$ ) estimated from the NMAs model.<sup>35</sup> If the direct evidence is available, the combined estimation will be provided for NMAs. There are several methods to evaluate the potential difference in treatment effect estimated by direct and indirect comparisons.<sup>36-39</sup> We will apply node splitting method to explore the inconsistency of the model.<sup>36-40</sup> The deviance information criterion (DIC) will be used to assess the model fitness by comparing the fixed and random effects model, and the lower DIC is preferred.<sup>41</sup> To rank the

1  
2  
3 probabilities of the best intervention for various treatments, we will use SUCRA and the mean  
4 ranks.<sup>42</sup> SUCRA will be described with percentages, and larger values indicate the better ranks for  
5 the treatment. The generation of NMAs graphs and result figures will be performed by Stata  
6 software (version 12; Stata Corporation, College Station, Texas, USA). If the data are not  
7 available for quantitative analysis, we will describe and summarize the evidence.  
8  
9

### 10 11 **Sensitivity analysis and subgroup analysis**

12 The strategies employed to address the heterogeneity of pair-wise meta-analysis also can be used  
13 in network analysis to tackle inconsistency.<sup>23</sup> If the heterogeneity or inconsistency among the  
14 studies was detected, subgroup analysis will be conducted according to the effect modifiers,  
15 including sample size, severity of COPD, treatment duration. Also, the network  
16 meta-regression will be performed to explore the possible sources of inconsistency.<sup>43</sup> We will  
17 perform the sensitivity analysis to explore the robust conclusions of primary outcomes if feasible.  
18 Different levels of the methodological quality of studies will influence the overall effects.  
19 Sensitivity analysis will be conducted by removing trails that report the non-random sequence  
20 generation.  
21  
22  
23

### 24 25 **Publication bias**

26 Egger's regression test will be performed to assess the publication bias of the included studies. If  
27 feasible, we will also convey whether the small study effects exist in a network of interventions by  
28 the statistical model.<sup>44</sup>  
29

### 30 31 **Quality of evidence**

32 We will also assess the quality of evidence for the main outcomes with the GRADE approach (the  
33 Grading of Recommendations Assessment, Development and Evaluation).<sup>45</sup> The five items will be  
34 investigated, including limitations in study design, imprecision, indirectness and  
35 publication bias.  
36  
37

### 38 39 **Discussion**

40 Chinese medicine has been used more than thousands of years for the treatment of respiratory  
41 condition. Nowadays, Chinese herb formula is commonly used as adjuvant therapy for the  
42 management of AECOPD in China. Multiple Chinese herb formulas are recommended in clinical  
43 guideline or textbook, whilst different formulas for each Chinese syndrome. Although few studies  
44 have reviewed the effective of the individual formula, the relative therapeutic effect differences  
45 among these formulas are still uncertain. Therefore, we plan to conduct NMA to evaluate the  
46 comparative effectiveness of different Chinese herb formulas. This will be the first review to  
47 compare the effectiveness of six most commonly used Chinese herb formulas for the treatment of  
48 AECOPD. We hope that the results of our study will provide the clinical recommendation for  
49 patients with AECOPD in Chinese medicine clinical practice, and promote evidence-based for  
50 clinical Chinese medicine.  
51  
52  
53

### 54 55 **Ethics and dissemination**

56 This review doesn't require the ethical approval since the study bases on the published evidence.  
57 The results of network meta-analysis will be reported according to the PRISMA extension  
58  
59  
60



statement for reporting of systematic reviews incorporating network meta-analysis, and submitted to a peer-review journal.<sup>46</sup>

### Contributors

SL, XG and LW conceived and designed this study. SL and JC drafted the protocol. JL and JZ will conduct the search, data screening and extraction. SL, JC, YH, LW, LY and XG have critically reviewed the manuscript and approved it for publication.

### Conflicts of interest

None declared

### Provenance and peer review

Not commissioned; externally peer reviewed

### Funding

This study is supported by Guangdong Provincial Department of Science and Technology, Guangdong, China (the Project Grant No. 2014A020221020) and Clinical Research Special Project of Guangdong Provincial Hospital of Chinese Medicine (Grant number YN2014LN10)

### Figure legends

**Figure 1. Flowchart of searching and screening studies.**

### Reference

1. Global Strategy for the Diagnosis, Management and Prevention of COPD, Global Initiative for Chronic Obstructive Lung Disease (GOLD) 2016. <http://www.goldcopd.org>.
2. Lim S, Lam DC, Muttalif AR, et al. Impact of chronic obstructive pulmonary disease (COPD) in the Asia-Pacific region: the EPIC Asia population-based survey. *Asia Pacific family medicine*. 2015;14(1):4.
3. Lopez AD, Shibuya K, Rao C, et al. Chronic obstructive pulmonary disease: current burden and future projections. *The European respiratory journal*. 2006;27(2):397-412.
4. Mathers CD, Loncar D. Projections of global mortality and burden of disease from 2002 to 2030. *PLoS medicine*. 2006;3(11):e442.
5. World Health Organization. Chronic respiratory diseases, burden of chronic obstructive pulmonary disease. Available from URL: <http://www.who.int/respiratory/copd/burden/en>.
6. Spencer S, Jones PW. Time course of recovery of health status following an infective exacerbation of chronic bronchitis. *Thorax*. 2003;58(7):589-93.
7. Suissa S, Dell'Aniello S, Ernst P. Long-term natural history of chronic obstructive pulmonary disease: severe exacerbations and mortality. *Thorax*. 2012;67(11):957-63.
8. Celli BR, Thomas NE, Anderson JA, et al. Effect of pharmacotherapy on rate of decline of lung function in chronic obstructive pulmonary disease: results from the TORCH study. *American journal of respiratory and critical care medicine*. 2008;178(4):332-8.
9. Ko FW, Chan KP, Hui DS, et al. Acute exacerbation of COPD. *Respirology (Carlton, Vic)*. 2016;21(7):1152-65.
10. Hu J, Zhang J, Zhao W, et al. (2011) Cochrane systematic reviews of Chinese herbal medicines:

1  
2  
3 an overview. PLoS One 6: e28696.

4 11. Chung VC, Wu X, Ma PH, et al. Chinese Herbal Medicine and Salmeterol and Fluticasone  
5 Propionate for Chronic Obstructive Pulmonary Disease: Systematic Review and Network  
6 Meta-Analysis. *Medicine*. 2016;95(20):e3702.

7 12. Liu S, Shergis J, Chen X, et al. Chinese herbal medicine (weijing decoction) combined with  
8 pharmacotherapy for the treatment of acute exacerbations of chronic obstructive pulmonary disease.  
9 Evidence-based complementary and alternative medicine : eCAM. 2014;2014:257012.

10 13. Chinese Academy of Chinese Medical Sciences. (2011) Evidence-Based Guidelines of Clinical  
11 Practice in Chinese Medicine [in Chinese: 中医循证临床实践指南]. Chinese Academy of Chinese  
12 Medical Sciences Publishing House, Beijing, People's Republic of China.

13 14. China Association of Chinese Medicine. Guideline for diagnosis and treatment of common  
14 internal disease in Chinese medicine: Symptoms in Chinese medicine (2008). China Press of  
15 Traditional Chinese Medicine, Beijing, People's Republic of China.

16 15. China Association of Chinese Medicine. Guideline for diagnosis and treatment of common  
17 internal disease in Chinese medicine: Diseases of modern medicine (2008). China Press of Traditional  
18 Chinese Medicine, Beijing, People's Republic of China.

19 16. Li JF, Li DS. Experimental study on anti-inflammation and expelling phlegm effect of Dingchuan  
20 decoction. *Chinese journal of experimental traditional medical formulae*. 2002;8(5):40-41

21 17. Li SQ. Effect of IL-8 in peripheral blood of acute exacerbation of chronic obstructive pulmonary  
22 disease with Weijing decoction combined with western medicine. *Medical information*. 2009,  
23 22(12):2728-2731

24 18. Liu L, Zhang HY. The Pharmacological Effect of Maxingshigan decoction. *Drug*  
25 *research*. 2015,(12):16-17

26 19. Duval C, Auge N, Frisach MF, et al. Mitochondrial oxidative stress is modulated by oleic acid via  
27 an epidermal growth factor receptor-dependent activation of glutathione peroxidase. *The Biochemical*  
28 *journal*. 2002;367(Pt 3):889-94.

29 20. Yuk JE, Woo JS, Yun CY, et al. Effects of lactose-beta-sitosterol and beta-sitosterol on  
30 ovalbumin-induced lung inflammation in actively sensitized mice. *International immunopharmacology*.  
31 2007;7(12):1517-27.

32 21. Perera WR, Hurst JR, Wilkinson TM, et al. Inflammatory changes, recovery and recurrence at  
33 COPD exacerbation. *The European respiratory journal*. 2007;29(3):527-34

34 22. Yang XY, Yang ZL, Huang FH, et al. Therapeutic effect and symptom changes of phlegm-clearing  
35 decoction combined with western medicine for COPD with acute exacerbation: a systematic review  
36 and meta-analysis. *Chinese Archives of Traditional Chinese Medicine*. 2016;34(4):860-3.

37 23. Cipriani A, Higgins JP, Geddes JR, et al. Conceptual and technical challenges in network  
38 meta-analysis. *Annals of internal medicine*. 2013;159(2):130-7..

39 24. Jansen JP, Crawford B, Bergman G, et al. Bayesian meta-analysis of multiple treatment  
40 comparisons: an introduction to mixed treatment comparisons. *Value in health : the journal of the*  
41 *International Society for Pharmacoeconomics and Outcomes Research*. 2008;11(5):956-64.

42 25. Salanti G, Higgins JP, Ades AE, et al. Evaluation of networks of randomized trials. *Statistical*  
43 *methods in medical research*. 2008;17(3):279-301.

44 26. Lu G, Ades AE. Combination of direct and indirect evidence in mixed treatment comparisons.  
45 *Statistics in medicine*. 2004;23(20):3105-24.

46 27. Bucher HC, Guyatt GH, Griffith LE, et al. The results of direct and indirect treatment  
47  
48  
49  
50  
51  
52  
53  
54  
55  
56  
57  
58  
59  
60



- 1  
2  
3 comparisons in meta-analysis of randomized controlled trials. *Journal of clinical epidemiology*.  
4 1997;50(6):683-91.
- 5 28. Hasselblad V. Meta-analysis of multitreatment studies. *Medical decision making : an international*  
6 *journal of the Society for Medical Decision Making*. 1998;18(1):37-43.
- 7 29. Caldwell DM, Ades AE, Higgins JP. Simultaneous comparison of multiple treatments: combining  
8 direct and indirect evidence. *BMJ (Clinical research ed)*. 2005;331(7521):897-900.
- 9 30. Moher D, Shamseer L, Clarke M, et al. Preferred reporting items for systematic review and  
10 meta-analysis protocols (PRISMA-P) 2015 statement. *Systematic reviews*. 2015;4:1.
- 11 31. Group of Chronic Obstructive Pulmonary Disease, Branch of Respiratory Diseases, and Chinese  
12 Medical Association, "Guidance of diagnosis and treatment of chronic obstructive pulmonary disease  
13 (reversed edition in 2007)," *Chin J Tuberc Respir Dis*. 2007; 30(1):8-17.
- 14 32. Zheng XY. *Guidance for Clinical Research on New Drugs of TCM*, China Medical Science Press,  
15 2002.
- 16 33. Higgins JP GS. *Cochrane handbook for systematic reviews of interventions Version 5.1.0*. 2011.  
17 <http://www.handbook.cochrane.org>.
- 18 34. Lunn DJ, Thomas A, Best N, et al. WinBUGS - A Bayesian modelling framework: Concepts,  
19 structure, and extensibility. *Statistics and Computing*. 2000;10(4):325-37.
- 20 35. Jackson D, Barrett JK, Rice S, et al. A design-by-treatment interaction model for network  
21 meta-analysis with random inconsistency effects. *Statistics in medicine*. 2014;33(21):3639-54.
- 22 36. Dias S, Welton NJ, Caldwell DM, et al. Checking consistency in mixed treatment comparison  
23 meta-analysis. *Statistics in medicine*. 2010;29(7-8):932-44.
- 24 37. Lu G, Welton NJ, Higgins JP, et al. Linear inference for mixed treatment comparison  
25 meta-analysis: A two-stage approach. *Research synthesis methods*. 2011;2(1):43-60.
- 26 38. Song F, Altman DG, Glenny AM, et al. Validity of indirect comparison for estimating efficacy of  
27 competing interventions: empirical evidence from published meta-analyses. *BMJ (Clinical research ed)*.  
28 2003;326(7387):472.
- 29 39. Krahn U, Binder H, König J. A graphical tool for locating inconsistency in network meta-analyses.  
30 *BMC medical research methodology*. 2013;13:35.
- 31 40. Lu G, Ades AE. Assessing Evidence Inconsistency in Mixed Treatment Comparisons. *Journal of*  
32 *the American Statistical Association*. 2006;101(474):447-59.
- 33 41. Spiegelhalter DJ, Best NG, Carlin BP, et al. Bayesian measures of model complexity and fit.  
34 *Journal of the Royal Statistical Society*. 2002;64(4):583-639.
- 35 42. Salanti G, Ades AE, Ioannidis JP. Graphical methods and numerical summaries for presenting  
36 results from multiple-treatment meta-analysis: an overview and tutorial. *Journal of clinical*  
37 *epidemiology*. 2011;64(2):163-71.
- 38 43. Salanti G, Marinho V, Higgins JP. A case study of multiple-treatments meta-analysis demonstrates  
39 that covariates should be considered. *Journal of clinical epidemiology*. 2009;62(8):857-64.
- 40 44. Chaimani A, Salanti G. Using network meta-analysis to evaluate the existence of small-study  
41 effects in a network of interventions. *Research synthesis methods*. 2012;3(2):161-76.
- 42 45. Salanti G, Del Giovane C, Chaimani A, et al. Evaluating the quality of evidence from a network  
43 meta-analysis. *PloS one*. 2014;9(7):e99682.
- 44 46. Hutton B, Salanti G, Caldwell DM, et al. The PRISMA extension statement for reporting of  
45 systematic reviews incorporating network meta-analyses of health care interventions: checklist and  
46 explanations. *Annals of internal medicine*. 2015;162(11):777-84.
- 47  
48  
49  
50  
51  
52  
53  
54  
55  
56  
57  
58  
59  
60

1  
2  
3  
4  
5  
6  
7  
8  
9  
10  
11  
12  
13  
14  
15  
16  
17  
18  
19  
20  
21  
22  
23  
24  
25  
26  
27  
28  
29  
30  
31  
32  
33  
34  
35  
36  
37  
38  
39  
40  
41  
42  
43  
44  
45  
46  
47  
48  
49  
50  
51  
52  
53  
54  
55  
56  
57  
58  
59  
60

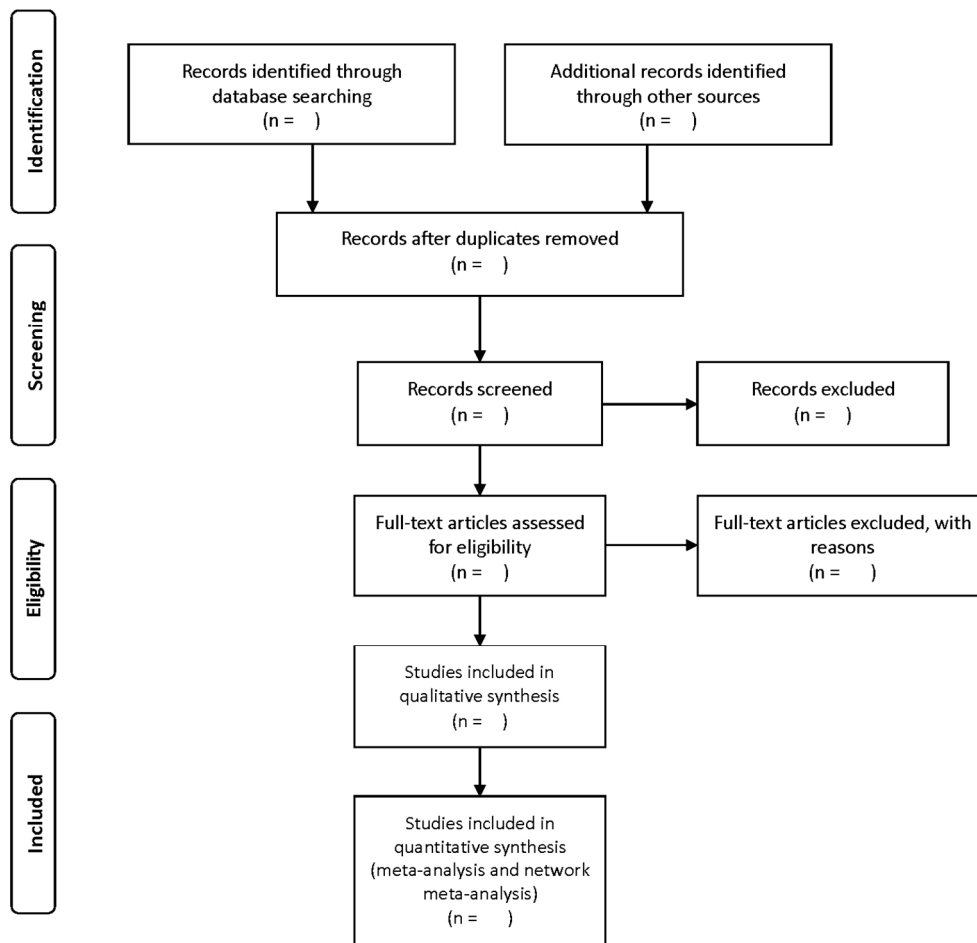

126x121mm (300 x 300 DPI)

BMJ

**PRISMA-P (Preferred Reporting Items for Systematic review and Meta-Analysis Protocols) 2015 checklist: recommended items to address in a systematic review protocol\***

| Section and topic                 | Item No | Checklist item                                                                                                                                                                                                                | Reported on page# |
|-----------------------------------|---------|-------------------------------------------------------------------------------------------------------------------------------------------------------------------------------------------------------------------------------|-------------------|
| <b>ADMINISTRATIVE INFORMATION</b> |         |                                                                                                                                                                                                                               |                   |
| Title:                            |         |                                                                                                                                                                                                                               |                   |
| Identification                    | 1a      | Identify the report as a protocol of a systematic review                                                                                                                                                                      | 1                 |
| Update                            | 1b      | If the protocol is for an update of a previous systematic review, identify as such                                                                                                                                            |                   |
| Registration                      | 2       | If registered, provide the name of the registry (such as PROSPERO) and registration number                                                                                                                                    | 2                 |
| Authors:                          |         |                                                                                                                                                                                                                               |                   |
| Contact                           | 3a      | Provide name, institutional affiliation, e-mail address of all protocol authors; provide physical mailing address of corresponding author                                                                                     | 1                 |
| Contributions                     | 3b      | Describe contributions of protocol authors and identify the guarantor of the review                                                                                                                                           | 7                 |
| Amendments                        | 4       | If the protocol represents an amendment of a previously completed or published protocol, identify as such and list changes; otherwise, state plan for documenting important protocol amendments                               | NA                |
| Support:                          |         |                                                                                                                                                                                                                               |                   |
| Sources                           | 5a      | Indicate sources of financial or other support for the review                                                                                                                                                                 | 7                 |
| Sponsor                           | 5b      | Provide name for the review funder and/or sponsor                                                                                                                                                                             | 7                 |
| Role of sponsor or funder         | 5c      | Describe roles of funder(s), sponsor(s), and/or institution(s), if any, in developing the protocol                                                                                                                            | 7                 |
| <b>INTRODUCTION</b>               |         |                                                                                                                                                                                                                               |                   |
| Rationale                         | 6       | Describe the rationale for the review in the context of what is already known                                                                                                                                                 | 2-3               |
| Objectives                        | 7       | Provide an explicit statement of the question(s) the review will address with reference to participants, interventions, comparators, and outcomes (PICO)                                                                      | 2-3               |
| <b>METHODS</b>                    |         |                                                                                                                                                                                                                               |                   |
| Eligibility criteria              | 8       | Specify the study characteristics (such as PICO, study design, setting, time frame) and report characteristics (such as years considered, language, publication status) to be used as criteria for eligibility for the review | 3-4               |
| Information sources               | 9       | Describe all intended information sources (such as electronic databases, contact with study authors, trial registers or other grey literature sources) with planned dates of coverage                                         | 4                 |
| Search strategy                   | 10      | Present draft of search strategy to be used for at least one electronic database, including planned limits, such that it could be repeated                                                                                    | 4-5               |

|                                    |     |                                                                                                                                                                                                                                                  |     |
|------------------------------------|-----|--------------------------------------------------------------------------------------------------------------------------------------------------------------------------------------------------------------------------------------------------|-----|
| Study records:                     |     |                                                                                                                                                                                                                                                  |     |
| Data management                    | 11a | Describe the mechanism(s) that will be used to manage records and data throughout the review                                                                                                                                                     | 5   |
| Selection process                  | 11b | State the process that will be used for selecting studies (such as two independent reviewers) through each phase of the review (that is, screening, eligibility and inclusion in meta-analysis)                                                  | 5   |
| Data collection process            | 11c | Describe planned method of extracting data from reports (such as piloting forms, done independently, in duplicate), any processes for obtaining and confirming data from investigators                                                           | 5   |
| Data items                         | 12  | List and define all variables for which data will be sought (such as PICO items, funding sources), any pre-planned data assumptions and simplifications                                                                                          | 5   |
| Outcomes and prioritization        | 13  | List and define all outcomes for which data will be sought, including prioritization of main and additional outcomes, with rationale                                                                                                             | 5   |
| Risk of bias in individual studies | 14  | Describe anticipated methods for assessing risk of bias of individual studies, including whether this will be done at the outcome or study level, or both; state how this information will be used in data synthesis                             | 5   |
| Data synthesis                     | 15a | Describe criteria under which study data will be quantitatively synthesised                                                                                                                                                                      | 5   |
|                                    | 15b | If data are appropriate for quantitative synthesis, describe planned summary measures, methods of handling data and methods of combining data from studies, including any planned exploration of consistency (such as $I^2$ , Kendall's $\tau$ ) | 5   |
|                                    | 15c | Describe any proposed additional analyses (such as sensitivity or subgroup analyses, meta-regression)                                                                                                                                            | 5-6 |
|                                    | 15d | If quantitative synthesis is not appropriate, describe the type of summary planned                                                                                                                                                               | 5-6 |
| Meta-bias(es)                      | 16  | Specify any planned assessment of meta-bias(es) (such as publication bias across studies, selective reporting within studies)                                                                                                                    | 6   |
| Confidence in cumulative evidence  | 17  | Describe how the strength of the body of evidence will be assessed (such as GRADE)                                                                                                                                                               | 6   |

**\* It is strongly recommended that this checklist be read in conjunction with the PRISMA-P Explanation and Elaboration (cite when available) for important clarification on the items. Amendments to a review protocol should be tracked and dated. The copyright for PRISMA-P (including checklist) is held by the PRISMA-P Group and is distributed under a Creative Commons Attribution Licence 4.0.**

*From: Shamseer L, Moher D, Clarke M, Ghersi D, Liberati A, Petticrew M, Shekelle P, Stewart L, PRISMA-P Group. Preferred reporting items for systematic review and meta-analysis protocols (PRISMA-P) 2015: elaboration and explanation. BMJ. 2015 Jan 2;349(jan02 1):g7647.*
